# Supplementary material
Source: Springer Nature journal article supplement (https://www.springermedizin.de/resource/supplementary/13229_2012_44_MOESM4_ESM.pdf/9676048)

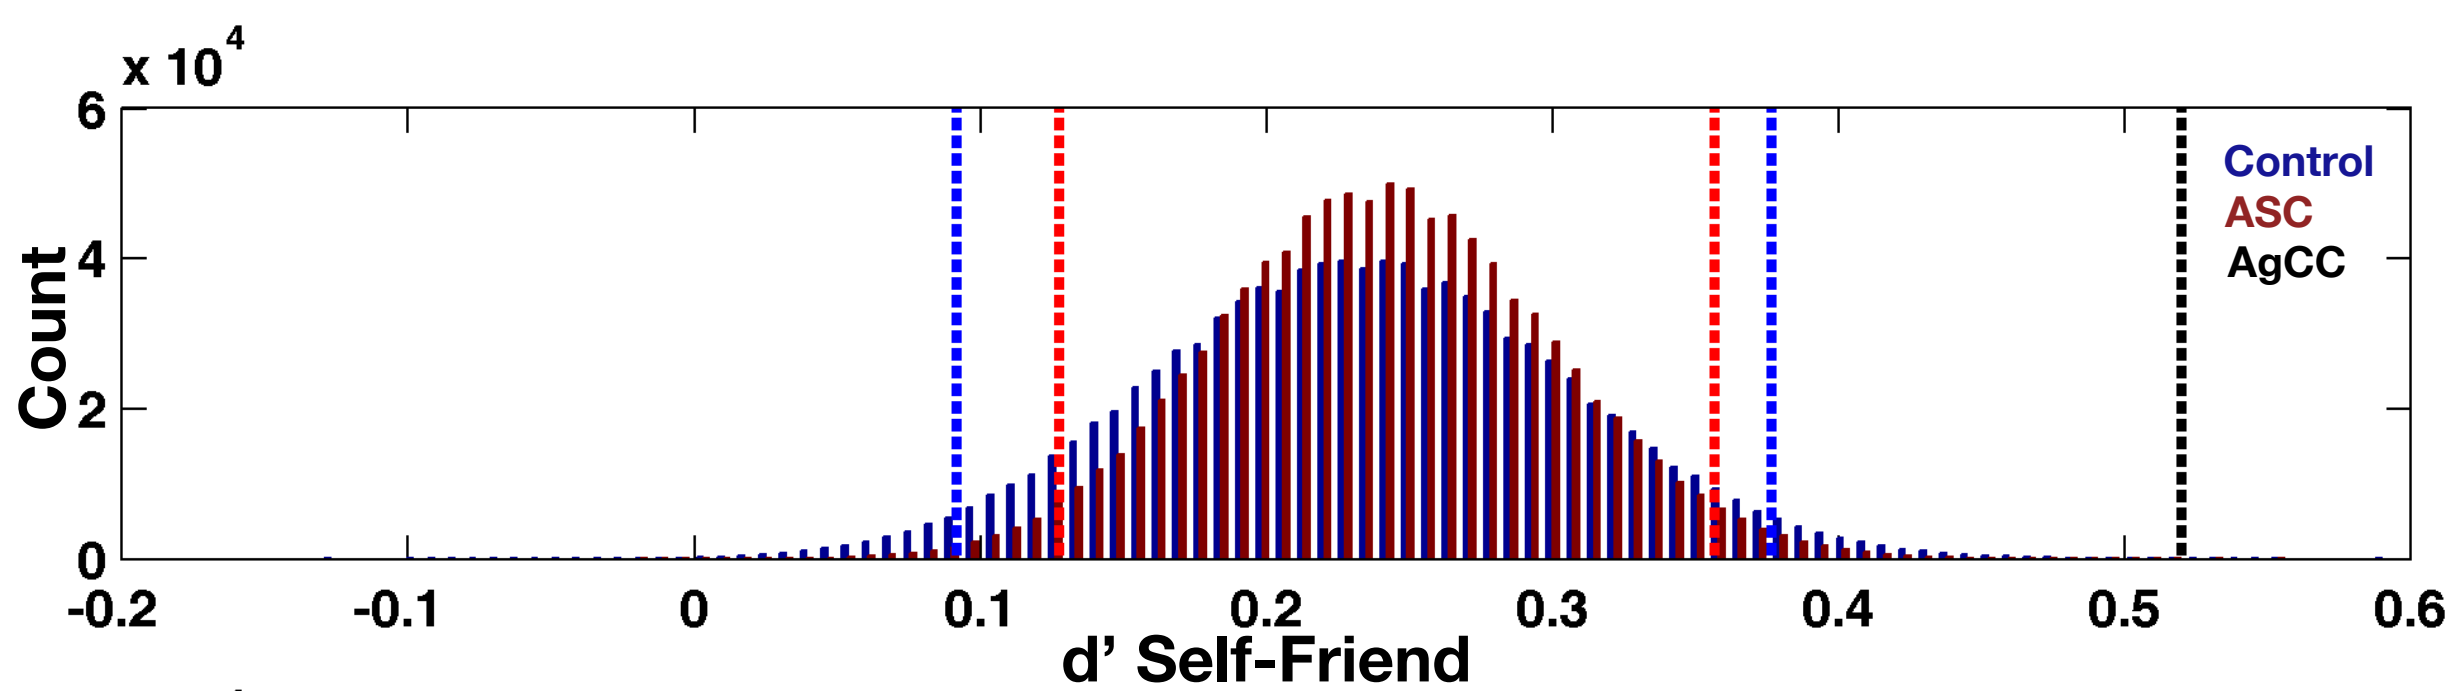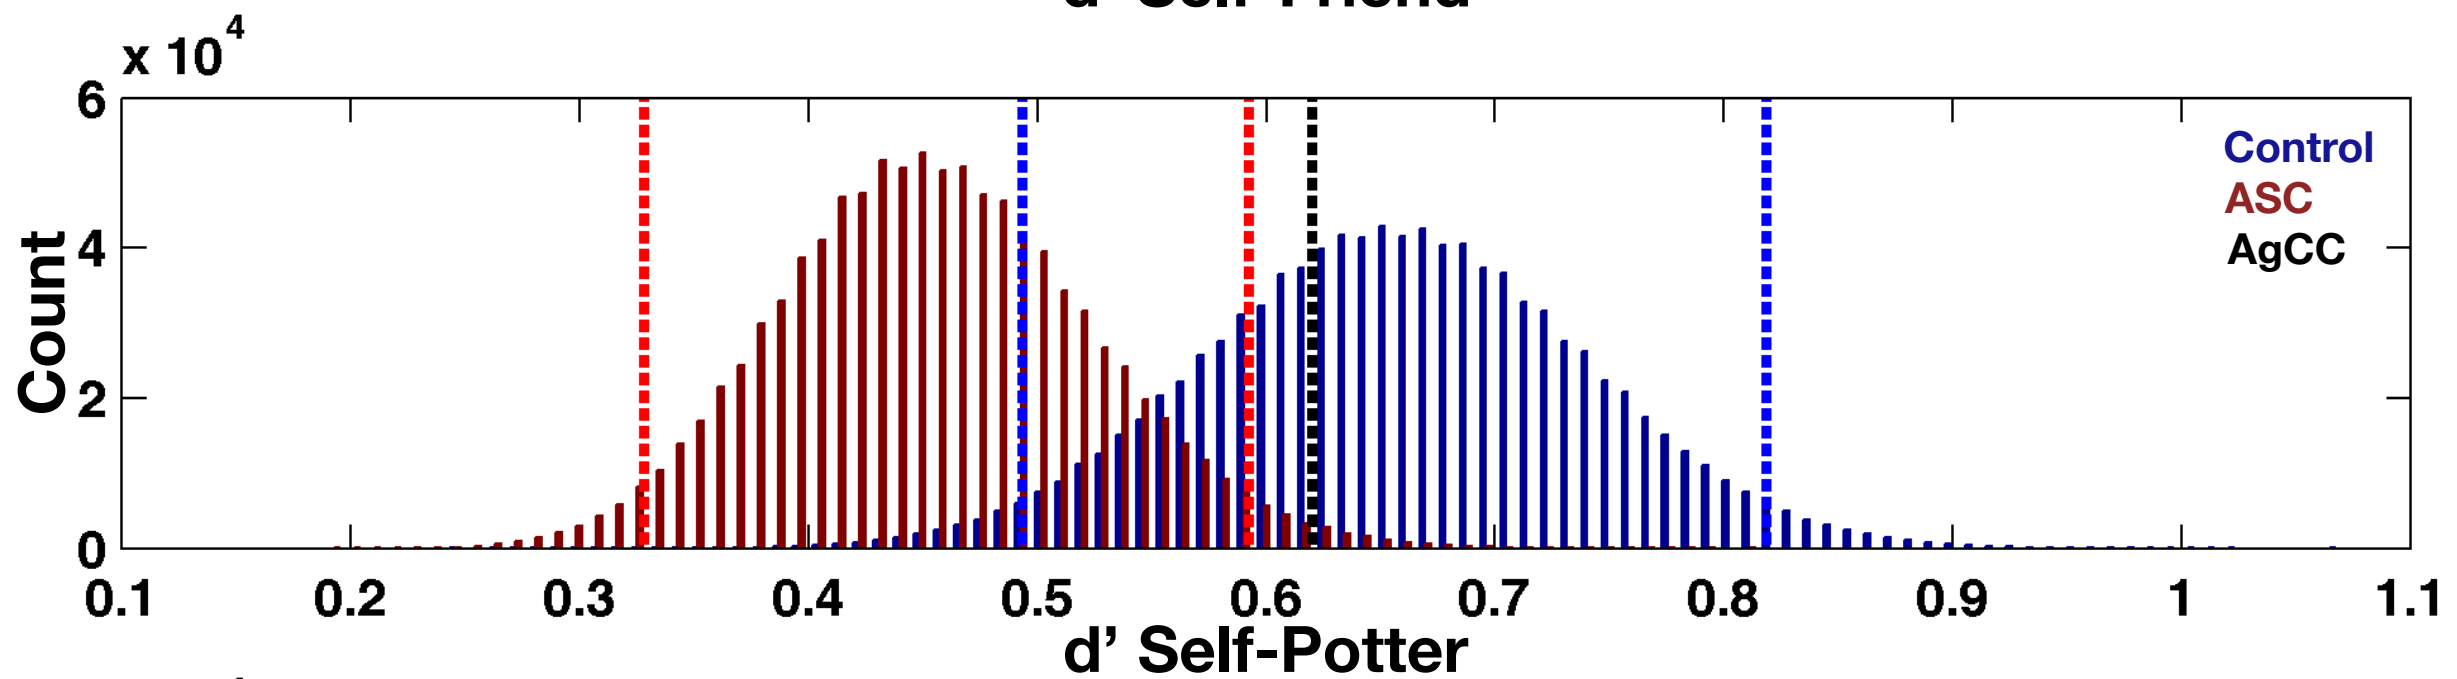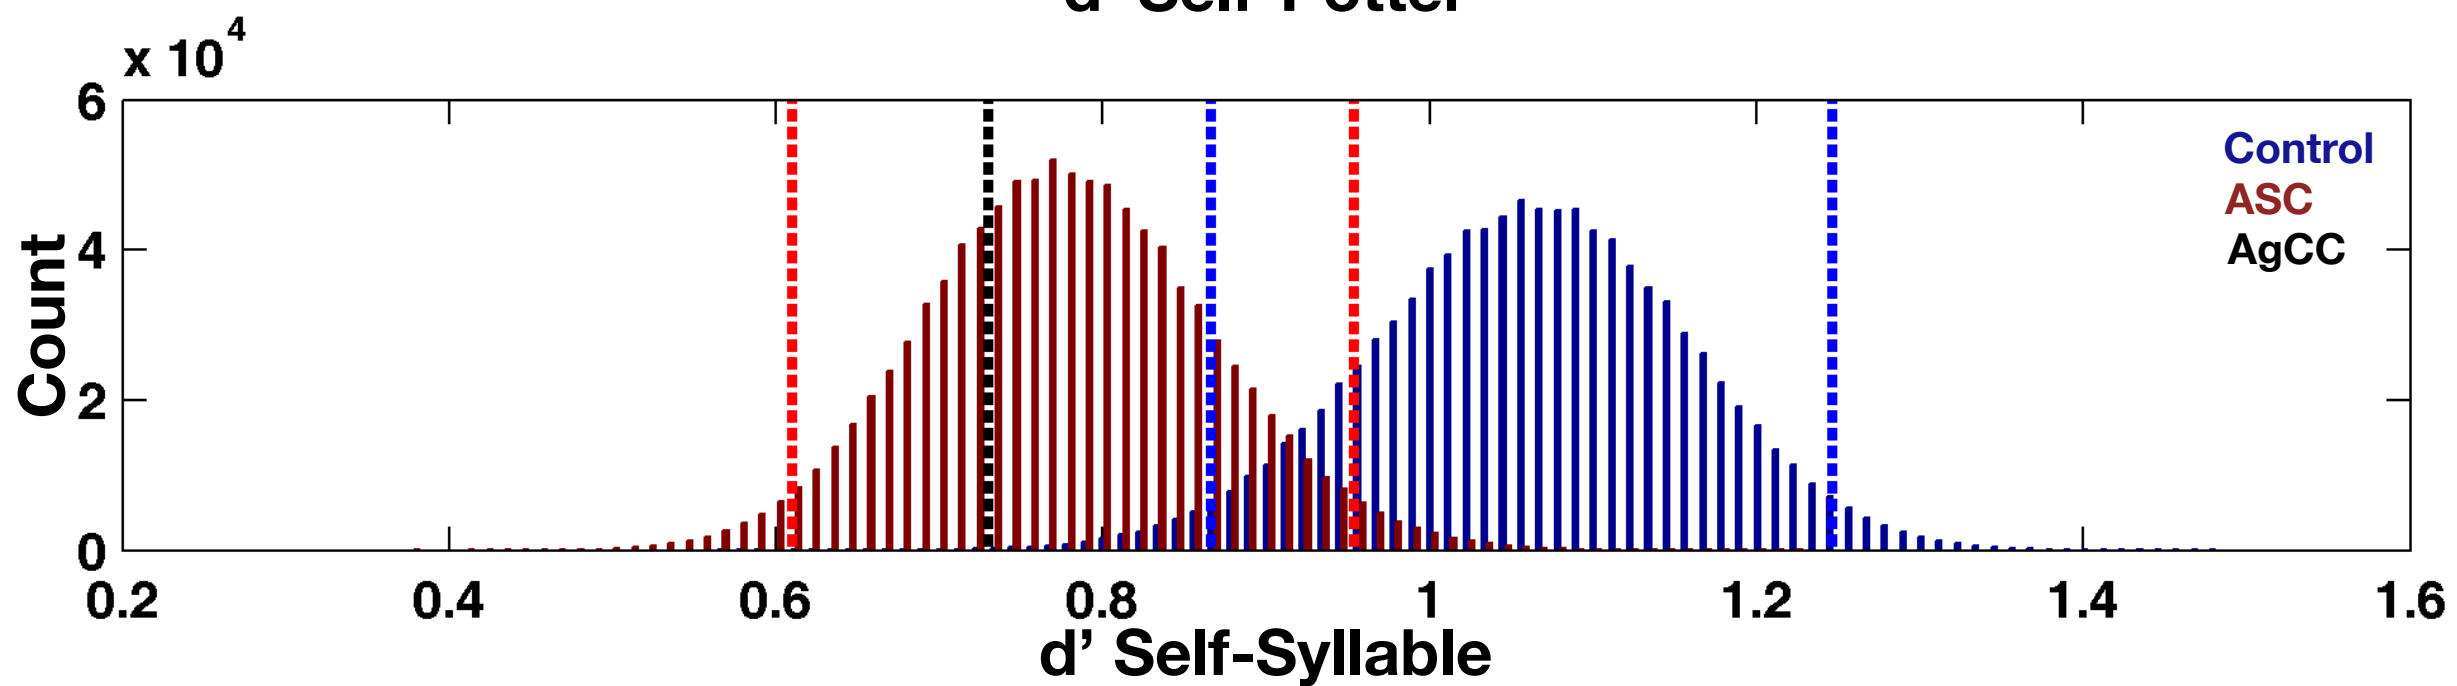

Supplement: MOESM4 [file 9676048]
